# Supplementary material for: Chromatin-associated microprocessor assembly is regulated by the U1 snRNP auxiliary protein PRP40
Source: PubMed Central journal article supplement (PMC9709975; doi:10.1093/plcell/koac278), 2022-09-10
Supplement: koac278_supplementary_data.pdf [file koac278_supplementary_data.pdf]

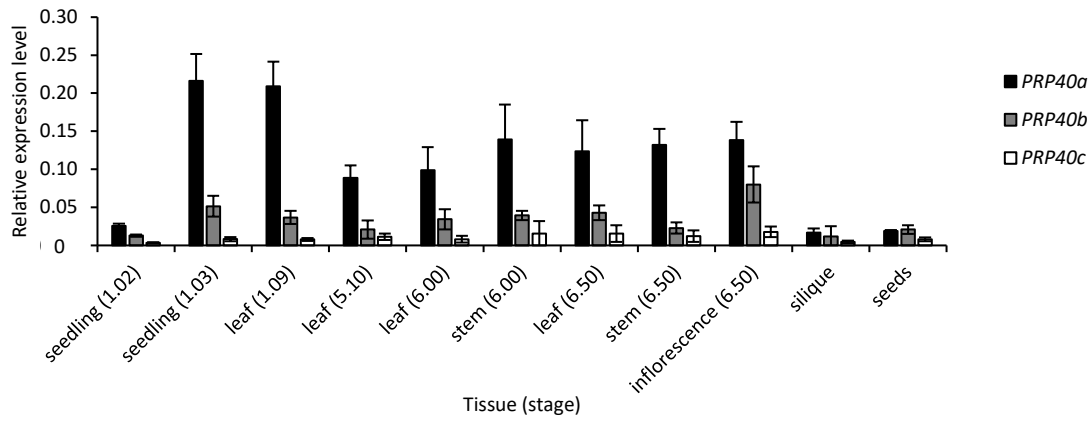

**Supplemental Figure S1** *AtPRP40* genes are differentially expressed during Arabidopsis development. RT-qPCR showing differences in the expression of the *AtPRP40A*, *B* and *C* genes in different Arabidopsis tissues and growth stages. Numbers in brackets on the x-axis indicate growth stages according to Boyes et al. 2001. Data represent means  $\pm$  SD ( $n = 3$ ). Supports Figure 1.

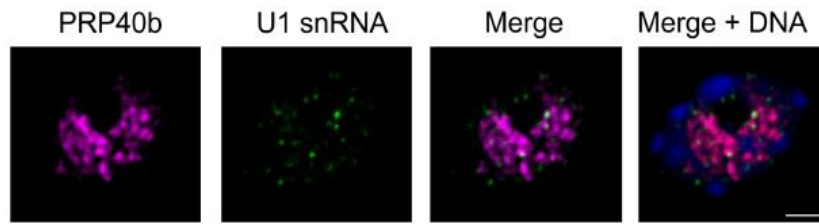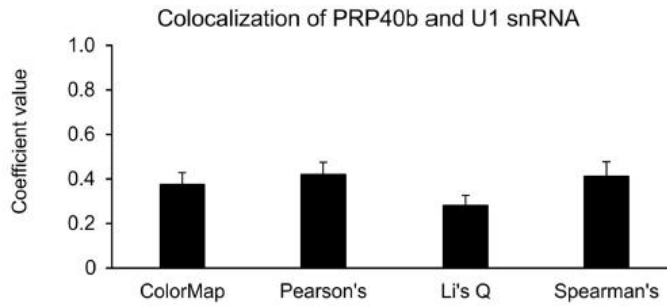

**Supplemental Figure S2** AtPRP40b is weakly colocalized with U1 snRNA. Colocalization of AtPRP40b (first image, magenta signals) and U1 snRNA (second image, green signals) in the cell nucleus. DNA was stained with Hoechst (blue). Scale bar = 2.5  $\mu\text{m}$  (*upper panel*). Colocalization coefficient values of the colocalization of AtPRP40b and U1 snRNA are shown below the images (*lower panel*). Data represent means  $\pm$  SD ( $n = 4$ ). Supports Figure 1.

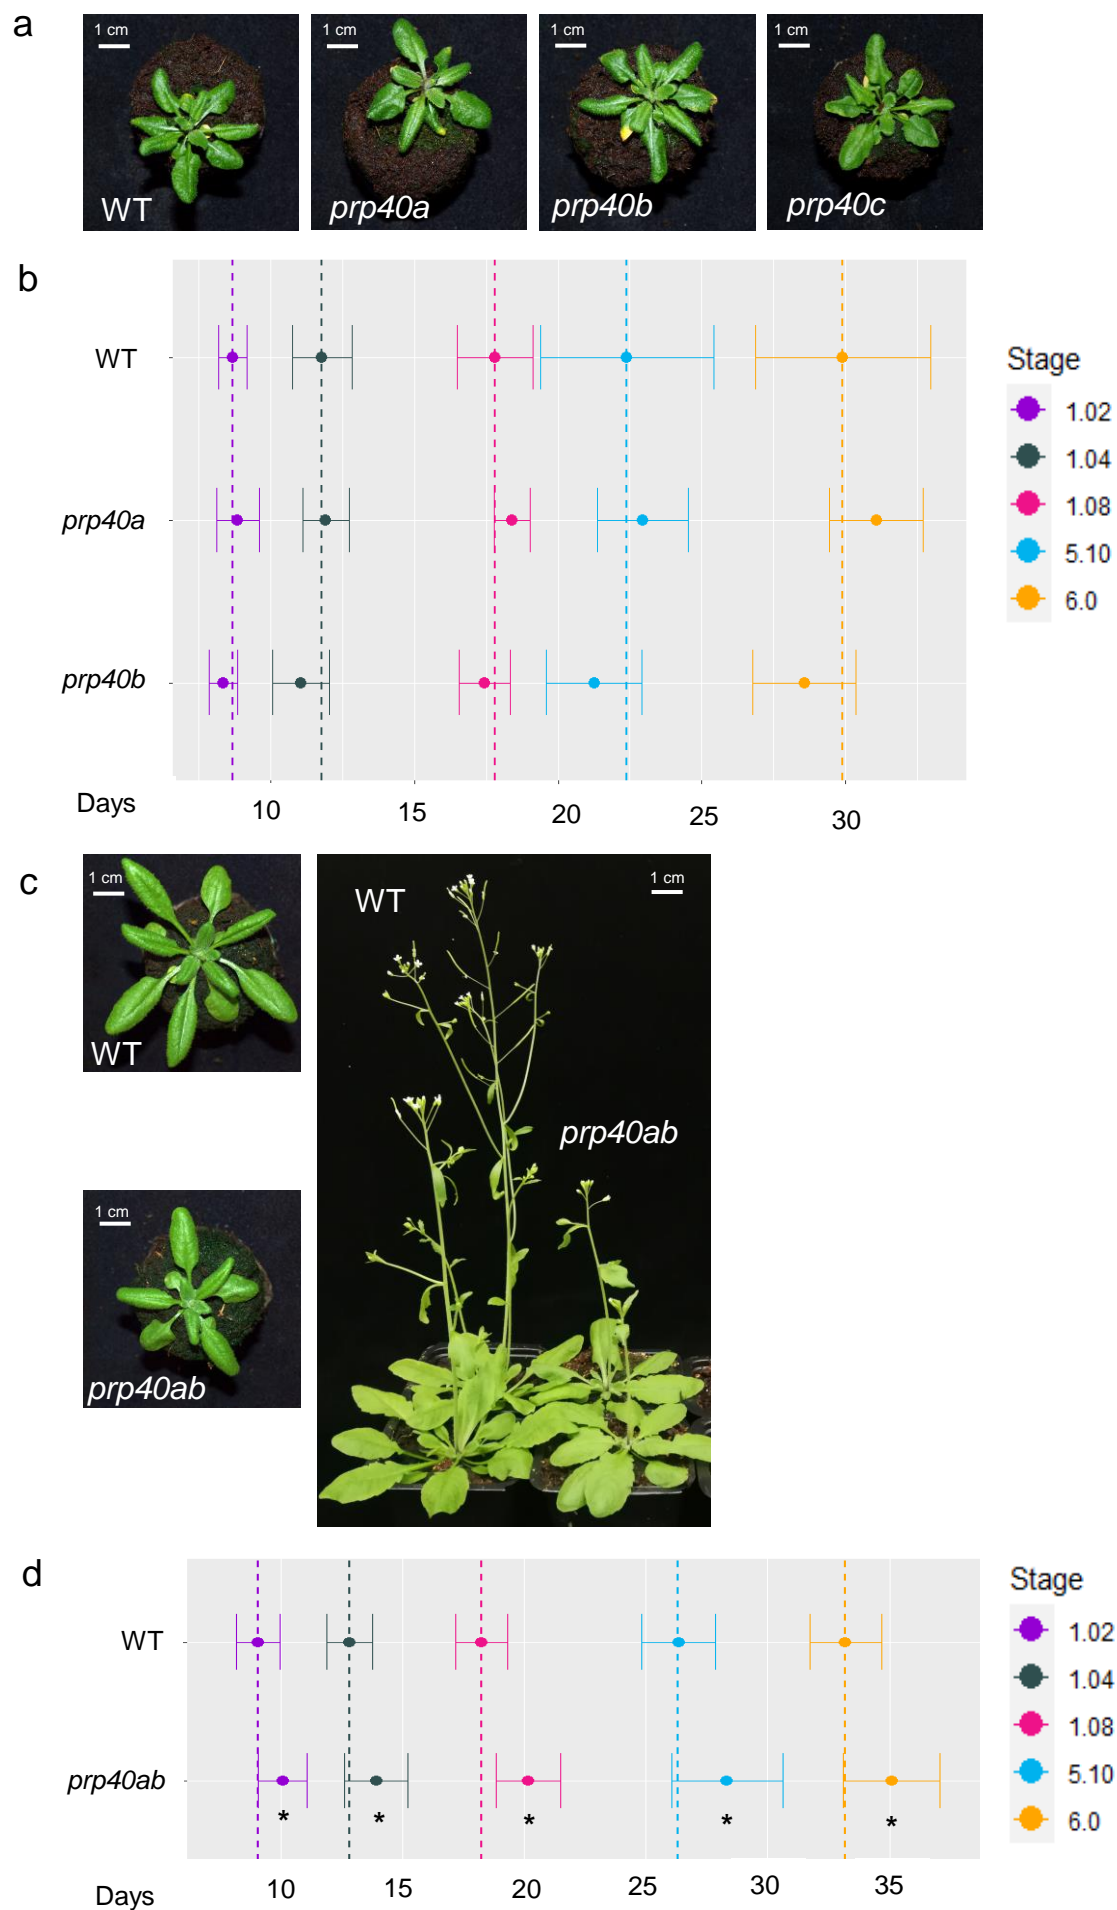

**Supplemental Figure S3** AtPRP40 is important for Arabidopsis development. A, Phenotypes of the *prp40a*, *prp40b* and *prp40c* single mutants and the wild type (WT). b, Growth analysis of the *prp40a*, *prp40b* and *prp40c* single mutants and the WT according to Boyes et al. 2001. Data represent means  $\pm$  SD (n = 3). c, Phenotype of the *prp40ab* double mutant and the WT. d, Growth analysis of the *prp40ab* mutant and the WT according to Boyes et al. 2001. Data represent means  $\pm$  SD (n = 3). \*  $P < 0.05$ . Supports Figure 1.

a

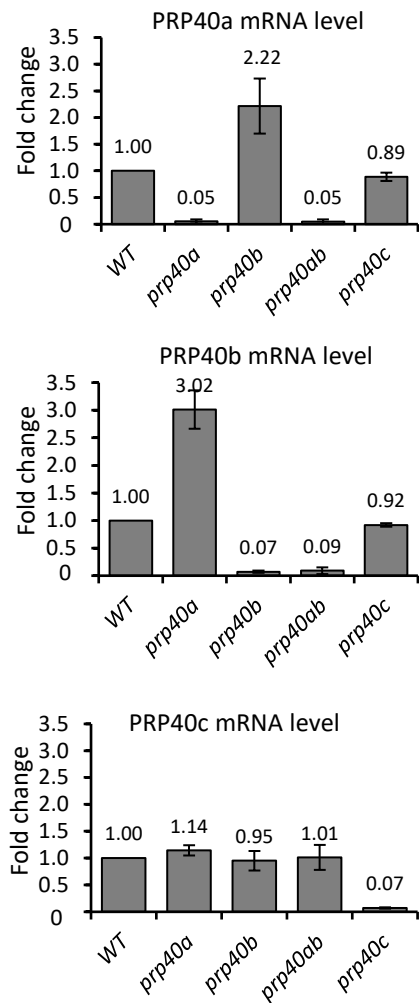

b

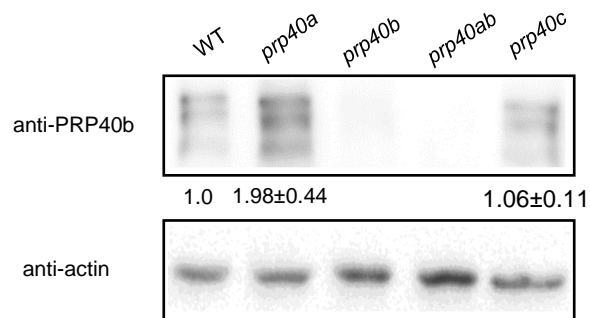

**Supplemental Figure S4** Redundant role of the AtPRP40a and b proteins. A, RT-qPCR showing the expression of *AtPRP40* genes in the single and double *prp40* mutants and the wild type (WT). Data represent means  $\pm$  SD ( $n = 3$ ). b, Immunoblot showing AtPRP40b protein levels in the single and double *atprp40* mutants and the WT. Numbers below the immunoblot represent means  $\pm$  SD ( $n = 3$ ). Supports Figure 1.

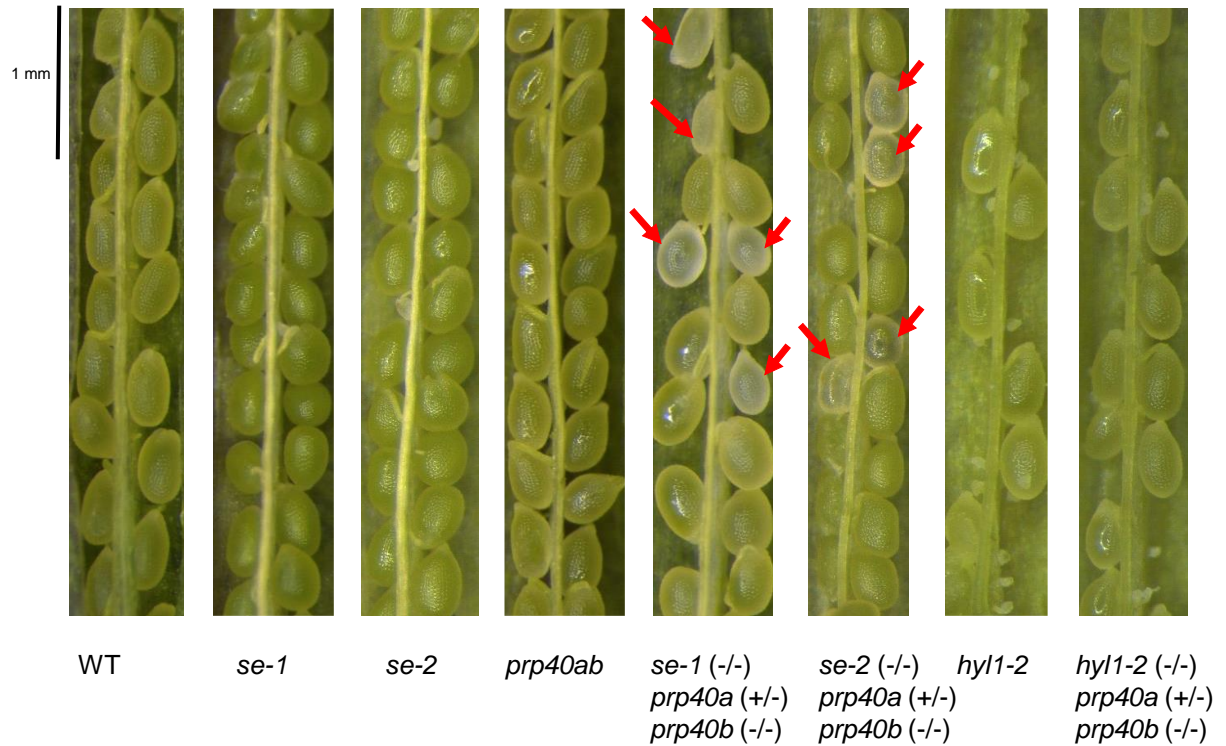

| Embryos    | WT   | <i>se-1</i> | <i>se-2</i> | <i>prp40ab</i> | <i>se-1xprp40ab</i> | <i>se-2xprp40ab</i> | <i>hyl1-2</i> | <i>hyl1-2xprp40ab</i> |
|------------|------|-------------|-------------|----------------|---------------------|---------------------|---------------|-----------------------|
| Counted    | 188  | 215         | 99          | 205            | 212                 | 283                 | 35            | 209                   |
| % abnormal | 2.75 | 6.56        | 2.08        | 7.75           | 25.69               | 26.37               | 0.98          | 3.26                  |
| SD         | 4.24 | 5.57        | 2.95        | 5.37           | 9.31                | 7.23                | 0.05          | 6.30                  |

**Supplemental Figure S5** Crosstalk between SE and AtPRP40 is crucial for plant development. Abnormal, developing embryos are indicated by red arrows. The number and percentage of abnormal embryos for each genotype are presented in the table. Aborted ovules in *hyl1-2* and *prp40ab* × *hyl1-2* were excluded from the analysis. Data represent means ± SD. N = 3 biological replicates with ≥ 3 siliques in each biological replicate). WT, wild type. Supports Figure 1.

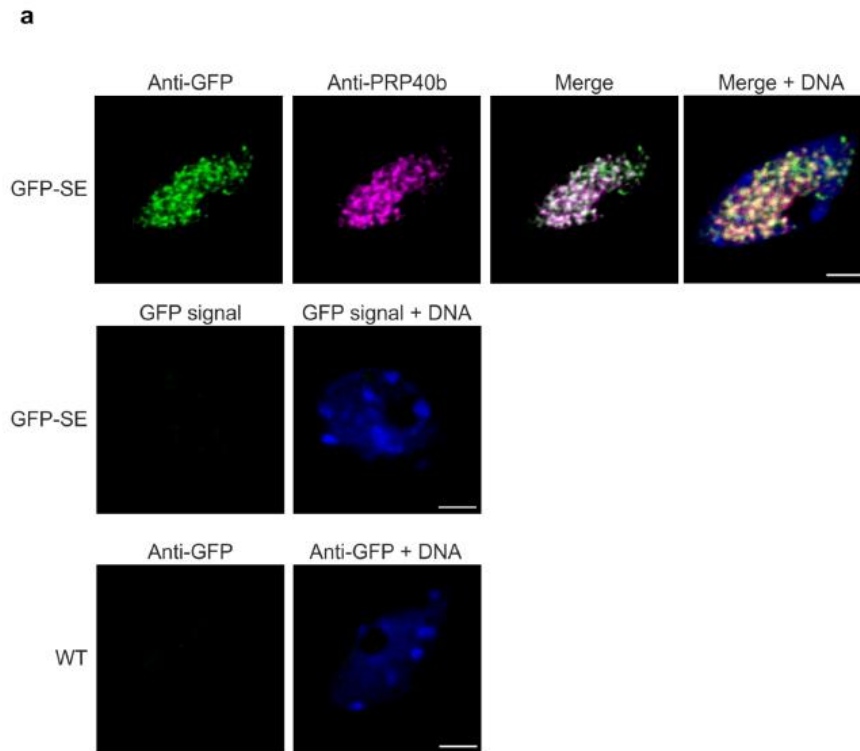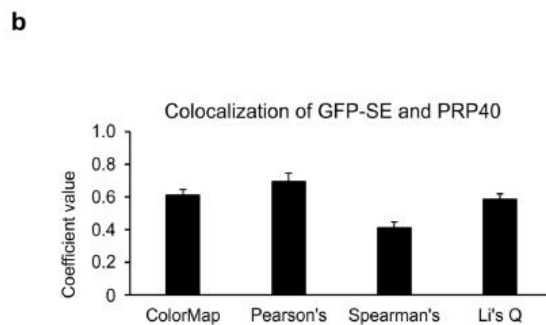

**Supplemental Figure S6** AtPRP40b colocalizes with SE. a, Colocalization of SE (first image, magenta signals) and AtPRP40b (second image, green signals) in the cell nucleus of the Arabidopsis transgenic line expressing GFP-SE. “GFP signal” indicates the signal recorded with the 488 nm laser on a fixed sample prepared without the use of any antibodies. DNA was stained with Hoechst (blue). Scale bar = 2.5  $\mu$ m. b, Coefficient values for colocalization of GFP-SE and PRP40b in the cell nucleus. Data represent means  $\pm$  SD. N = 3. Supports Figure 1.

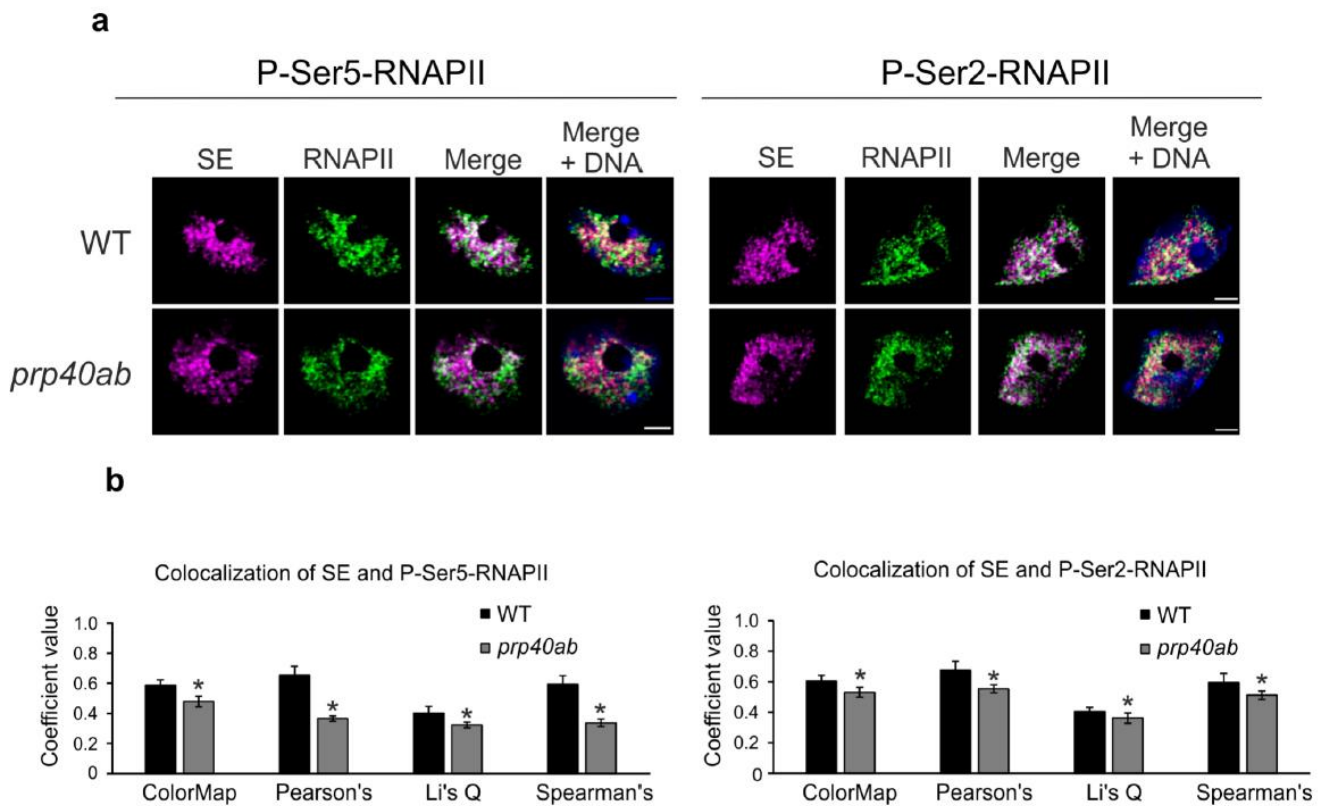

**Supplemental Figure S7** AtPRP40 regulates the colocalization of SE and RNAPII. a, Colocalization of SE (first column, magenta signals) and RNAPII phosphorylated at CTD Ser5 (P-Ser5-RNAPII) or Ser2 (P-Ser2-RNAPII) (second column, green signals) in wild-type (WT) and *prp40ab* cell nuclei. DNA was stained with Hoechst (blue). Scale bar = 2.5  $\mu$ m. b, Coefficient values for the colocalization of SE and RNAPII CTD phosphorylated at CTD Ser5 (P-Ser5-RNAPII) or Ser2 (P-Ser2-RNAPII) in WT and *prp40ab* cell nuclei. Data represent means  $\pm$  SD. N = 3. \*  $P < 0.001$  Supports Figure 1.

**a**

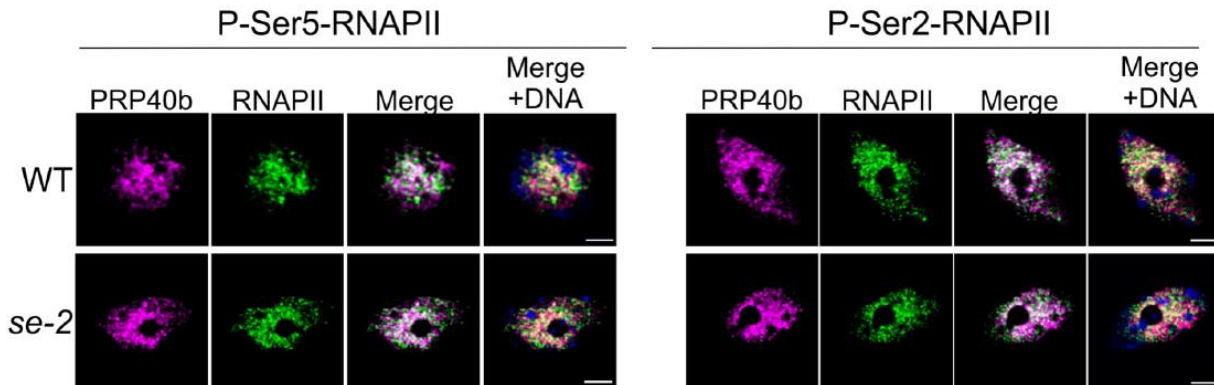

**b**

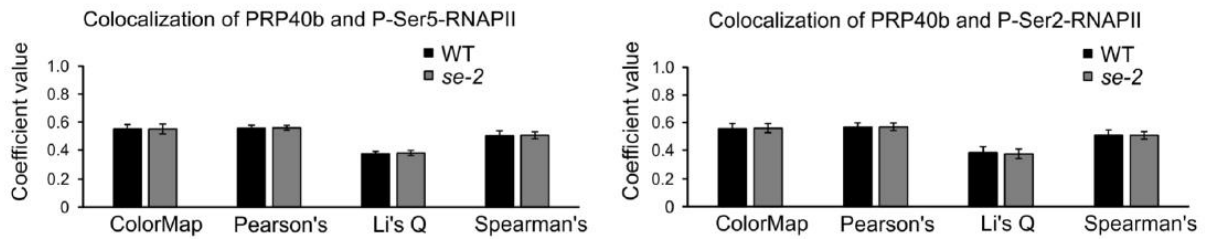

**Supplemental Figure S8** Colocalization of AtPRP40b and RNAPII in the cell nucleus is not regulated by SE. a, Colocalization of AtPRP40b (first columns, magenta signals) and RNAPII phosphorylated at CTD Ser5 (P-Ser5-RNAPII) or Ser2 (P-Ser2-RNAPII) (second columns, green signals) in wild-type (WT) and *se-2* cell nuclei. DNA was stained with Hoechst (blue). Scale bar = 2.5  $\mu$ m. b, Coefficient values for the colocalization of AtPRP40b and RNAPII CTD phosphorylated at CTD Ser5 (P-Ser5-RNAPII) or Ser2 (P-Ser2RNAPII) in WT and *se-2* cell nuclei. Data represent means  $\pm$  SD. N = 3. \*  $P < 0.001$ . Supports Figure 1.



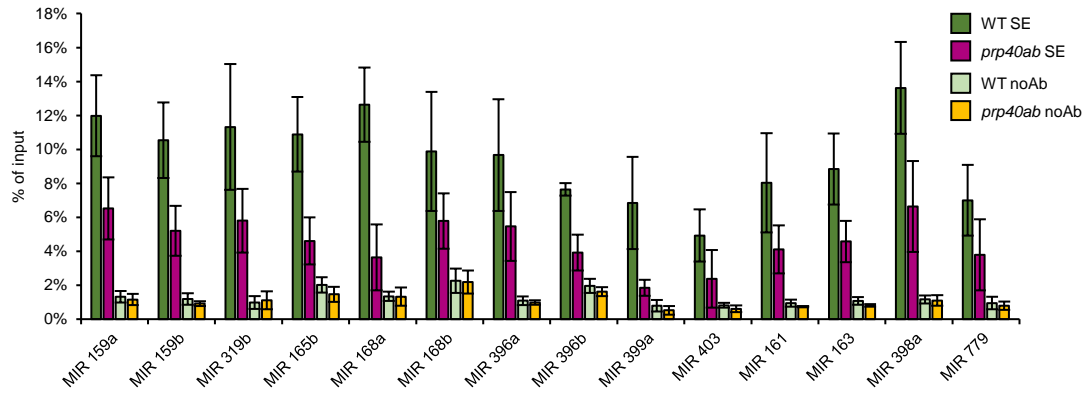

**Supplemental Figure S9** AtPRP40 is required for the proper accumulation of SE on miRNA genes. Quantitative ChIP-PCR showing the level of SE on miRNA genes in the *prp40ab* mutant and the wild type (WT). Data represent means  $\pm$  SD ( $n = 3$ ). Primers amplifying pri-miRNA/pre-miRNA coding regions were used. Supports Figure 2.

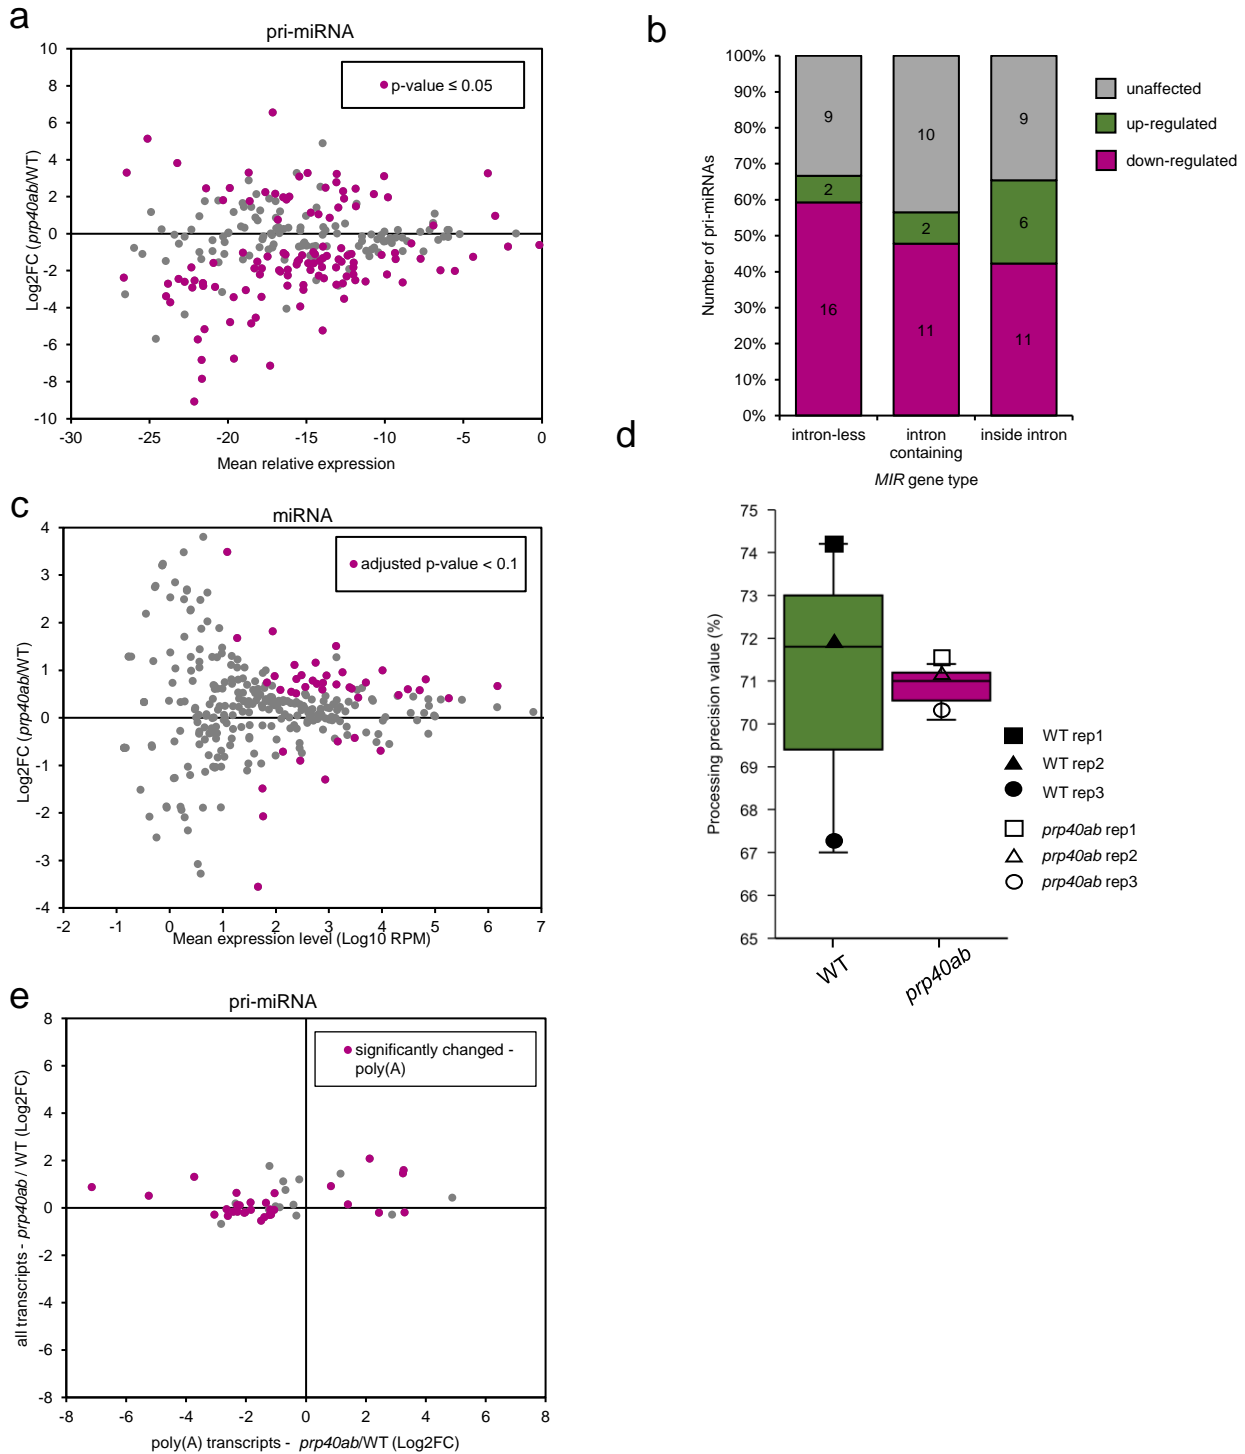

**Supplemental Figure S10** Effect of AtPRP40 on miRNA biogenesis. a, MA plot showing a relation between the fold change (*prp40ab*/wild type (WT)) of polyadenylated pri-miRNA and its mean relative expression. b, Number of changed polyadenylated pri-miRNAs in *prp40ab* depending on the miRNA gene type. c, MA plot showing a relation between the fold change (*prp40ab*/WT) of miRNA and its mean relative expression. d, Box plot showing the precision of miRNA processing in *prp40ab* plants compared with in WT plants. Boxes are drawn between the first and third quartiles, with an additional line drawn along the second quartile to mark the median. Whiskers indicate the minimums and maximums outside the first and third quartiles. e, Fold change (*prp40ab*/WT) comparison for polyadenylated and total *MIR* transcripts. Supports Figure 3.

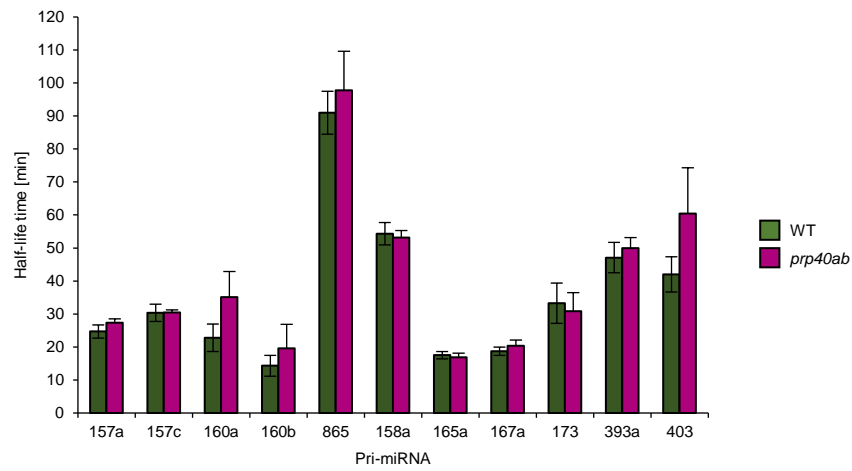

**Supplemental Figure S11** PRP40 does not affect the stability of poly(A)-tailed pri-miRNAs. Half-life time measurements using RT-qPCR were conducted after blocking transcription with cordycepin. Data represent means  $\pm$  SD ( $n = 3$ ). WT, wild type. Supports Figure 3.

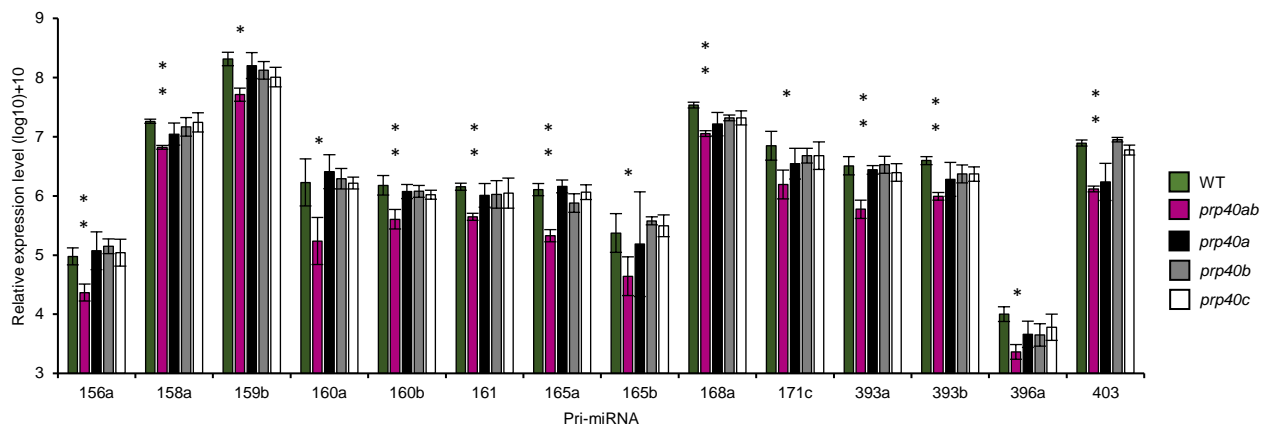

**Supplemental Figure S12** Single *prp40a/b/c* mutants do not show changes in the pri-miRNA levels. RT-qPCR showing relative expression levels of selected pri-miRNAs that were downregulated in the *prp40ab* double mutant. WT, wild type. Data represent means  $\pm$  SD. Means were compared using *t*-tests; *P*-value: \* < 0.05; \*\* < 0.01 (n = 3). Supports Figure 1.

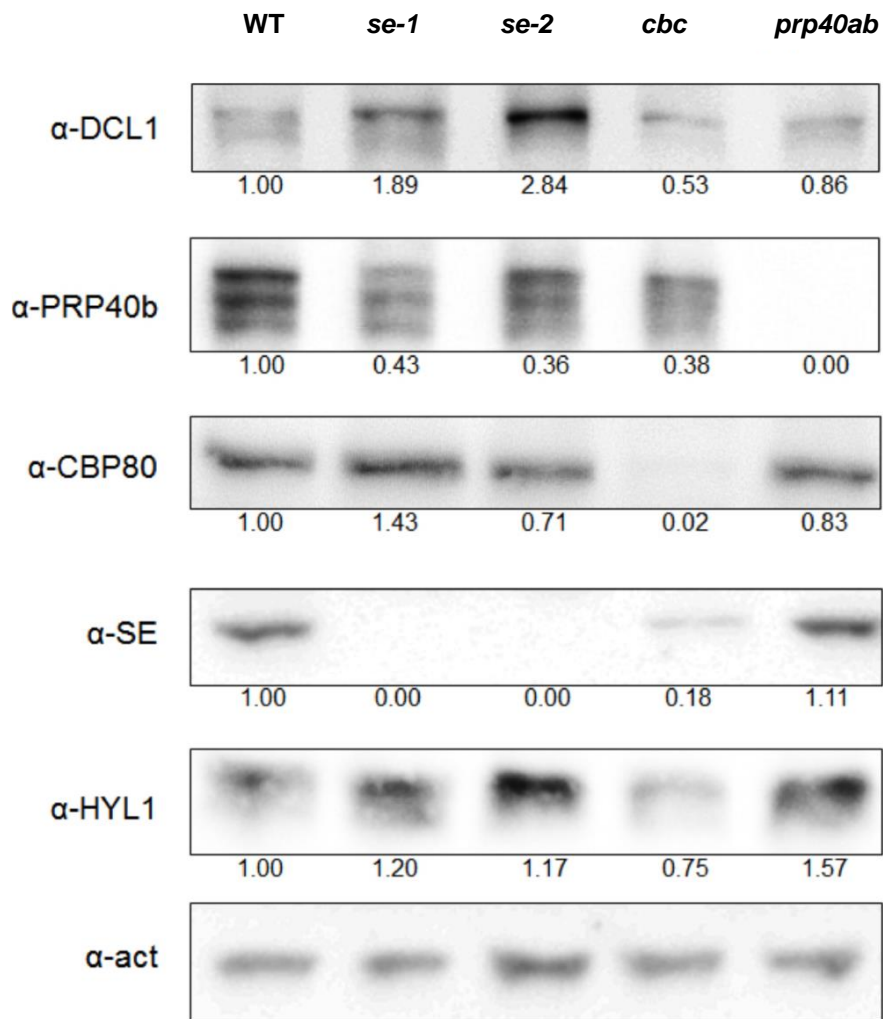

**Supplemental Figure S13** Levels of miRNA biogenesis-related proteins in *prp40ab*. DCL1, SE, HYL1, CBP80 and PRP40b levels in the *se-1*, *se-2*, *cbp20*  $\times$  *cbp80* and *prp40ab* mutants and in the wild type (WT ) determined by immunoblots. The level of ACTIN was used as a loading and normalization control. The numbers below the blots represent quantification of the band intensities. Supports Figure 1

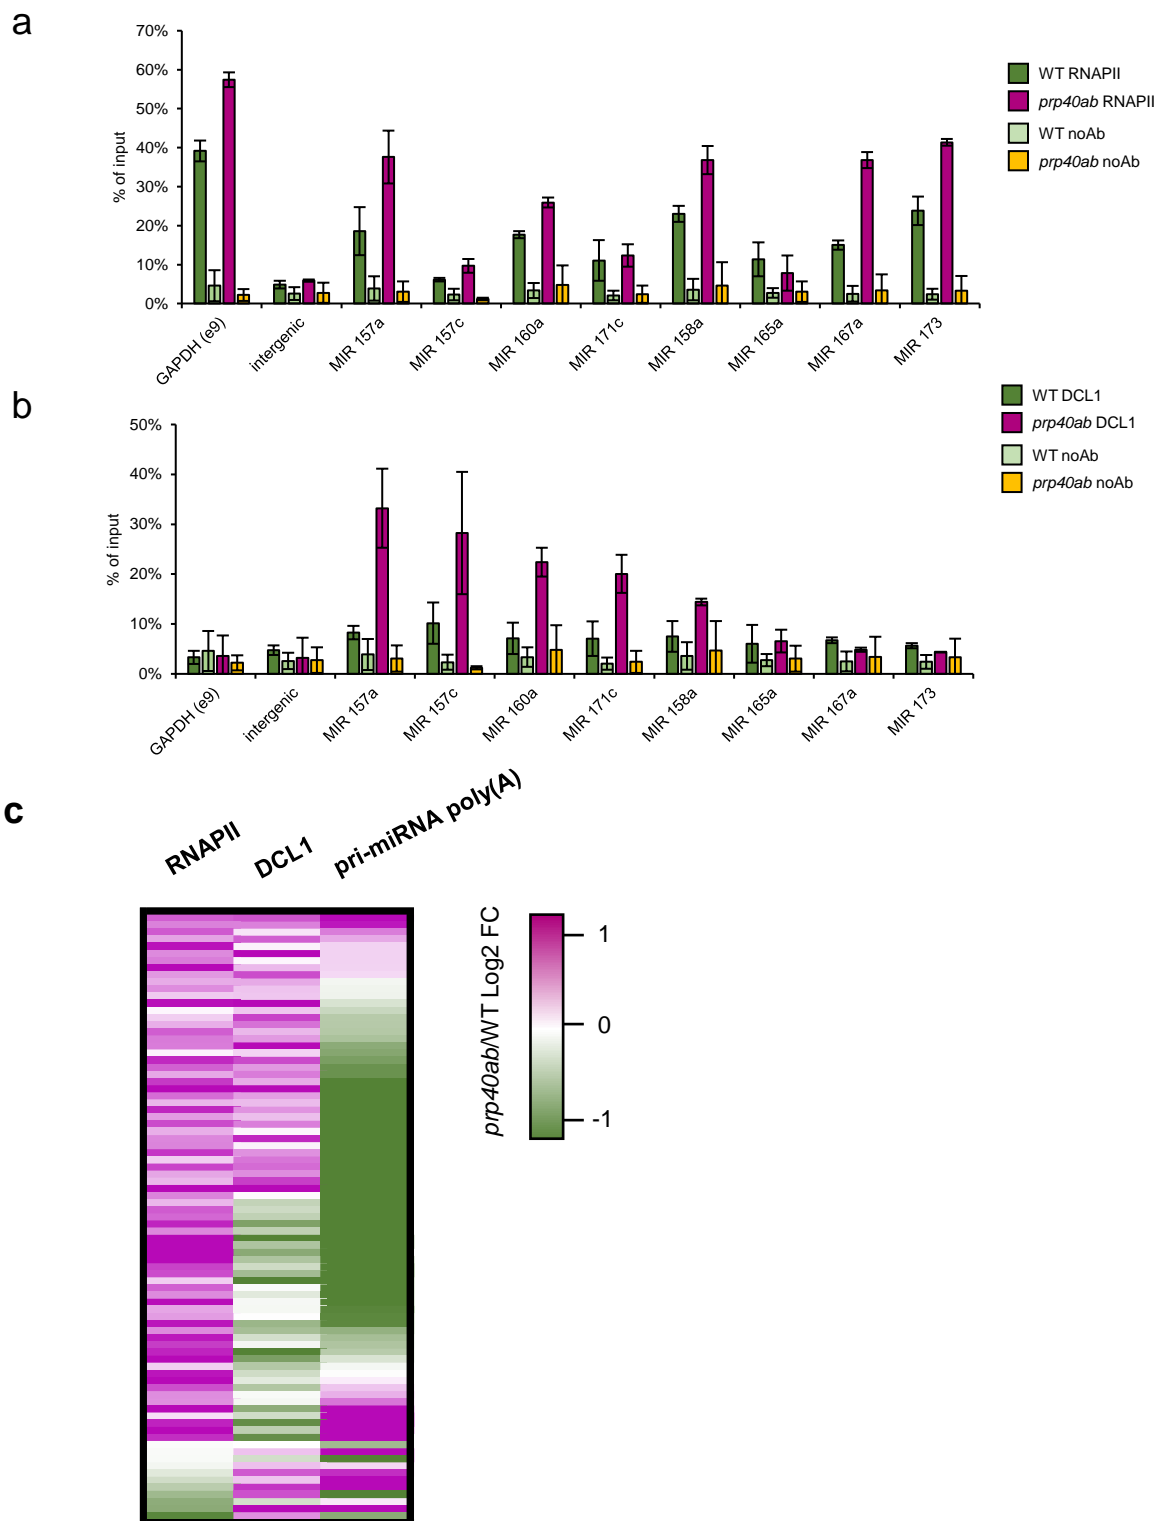

**Supplemental Figure S14** RNAPII and DCL1 distributions on *MIR* genes are affected in the *prp40ab* mutant. a, ChIP-qPCR showing changes in the RNAPII distribution on *MIR* genes in the *prp40ab* mutant and the wild type (WT). Data represent means  $\pm$  SD (n = 2). b, ChIP-qPCR showing changes in the DCL1 distribution on *MIR* genes in the *prp40ab* mutant and the WT. Data represent means  $\pm$  SD (n = 2). c, Heatmap based on RNAPII ChIPseq, DCL1 ChIPseq and RT-qPCR data for miRNA precursors. Only precursors with data available from three experiments are shown. Supports Figure 4 and 5.

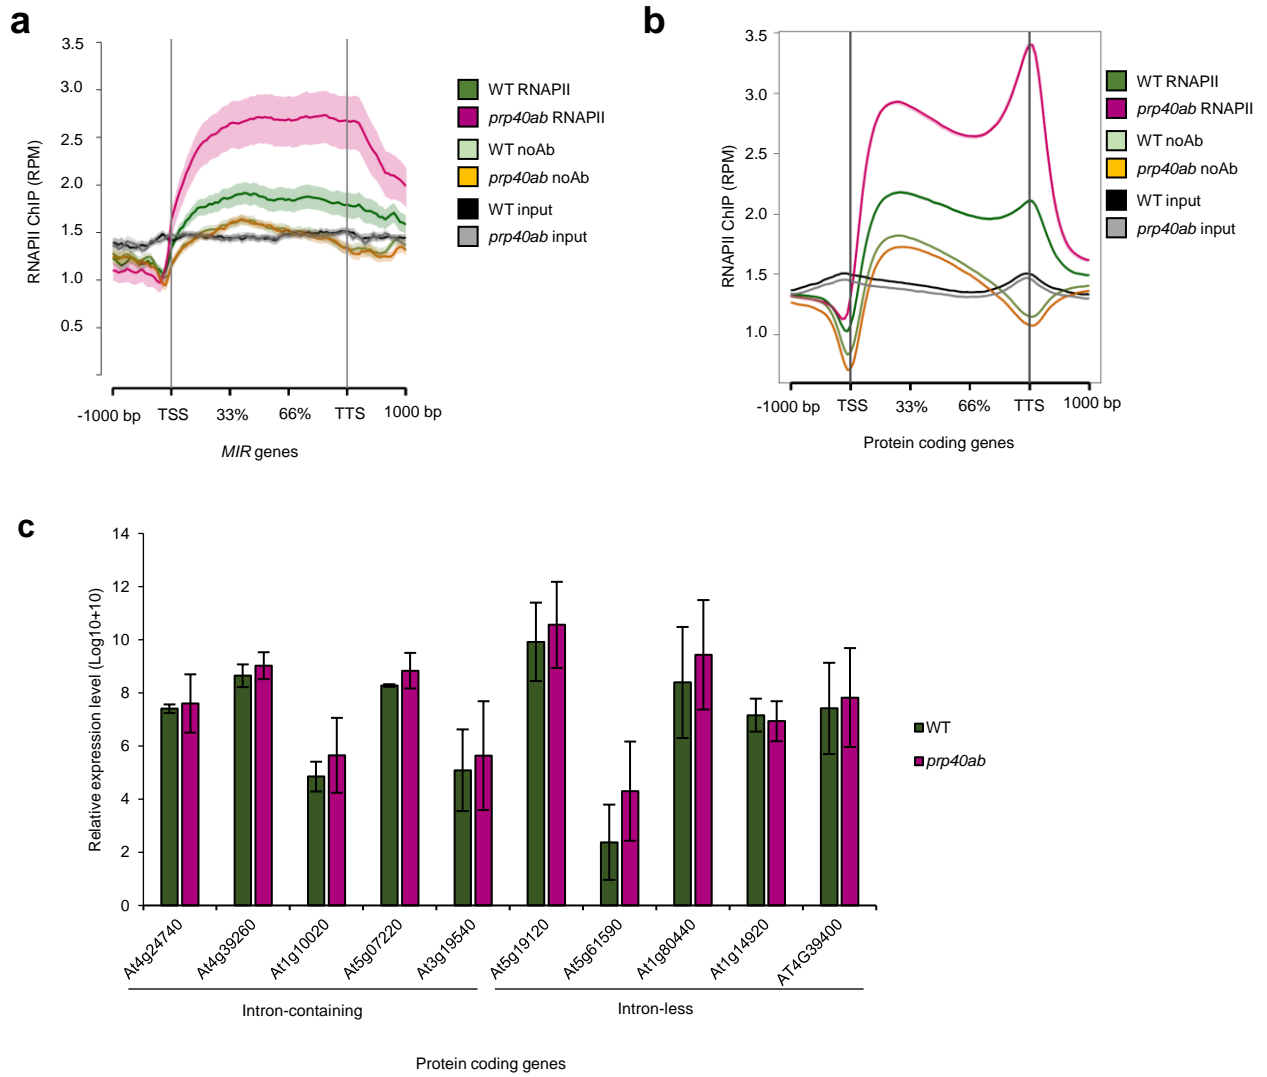

**Supplemental Figure S15** RNAPII distribution is affected in the *prp40ab* mutant. a, Metagenesis analysis of RNAPII distribution on miRNA genes with known structure based on ChIPseq data b, Metagenesis analysis of RNAPII distribution on protein coding genes based on ChIPseq data c, RT-qPCR showing relative expression levels of randomly selected protein coding genes with increased RNAPII occupancy in the *prp40ab* mutant and the wild type (WT). Data represent means  $\pm$  SD (n = 3). Supports Figure 4.

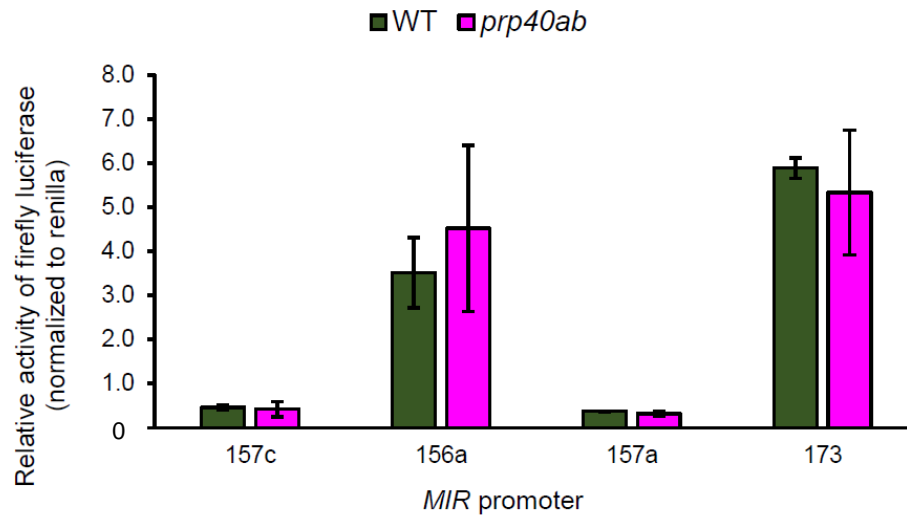

**Supplementary Figure S16.** *MIR* promoter activity does not depend on AtPRP40. The activity of firefly luciferase produced under the *MIR* promoter was measured in transfected Arabidopsis wild-type (WT) and *prp40ab* protoplasts. To control transfection efficiency differences, the firefly luciferase activity was normalized to *renilla* luciferase produced from the same plasmid. Data represent means  $\pm$  SD ( $n = 3$ ). Supports Figure 4.



**a**

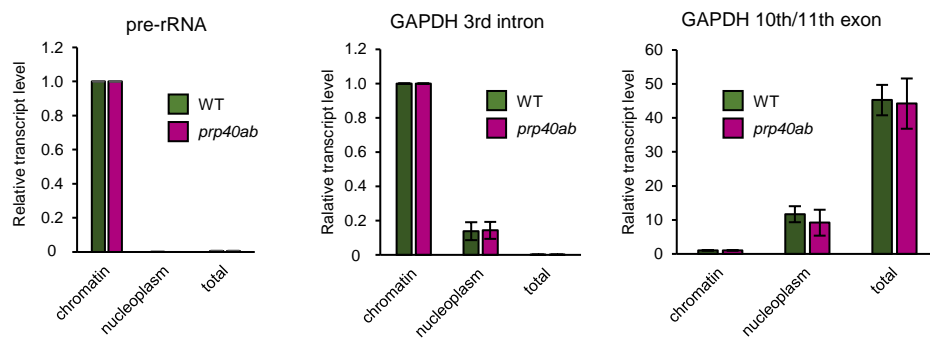

**b**

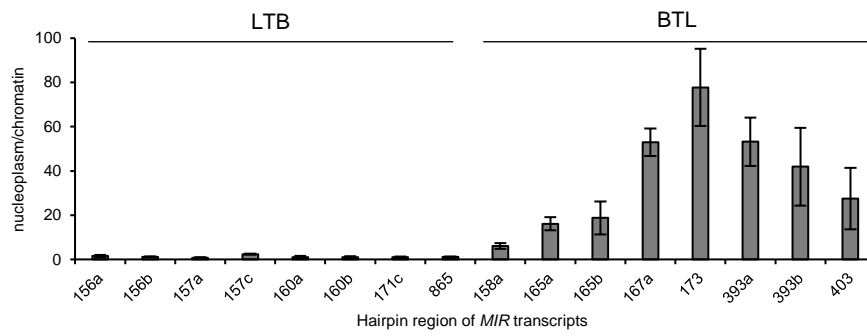

**c**

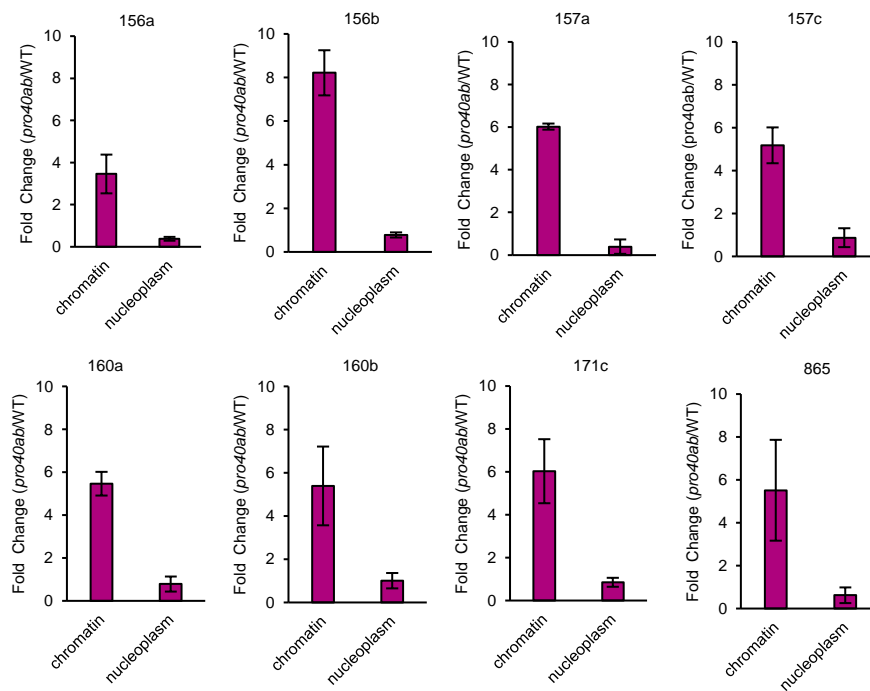

Supplemental Figure S17 Continued on the next page.

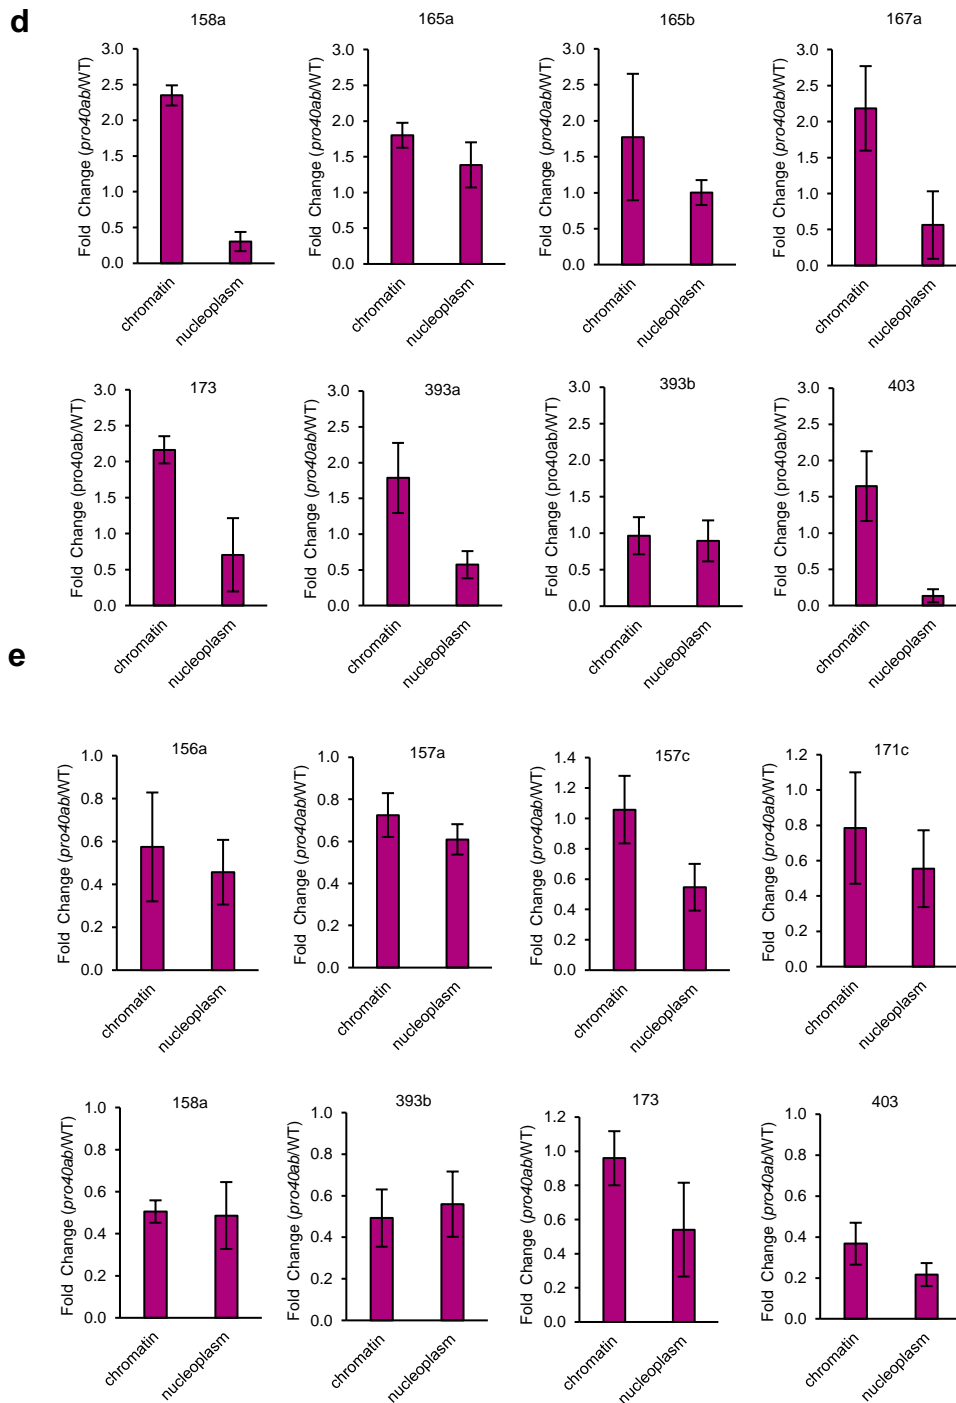

**Supplemental Figure S17** Distribution of *MIR* gene transcripts between chromatin and the nucleoplasm is affected in the *prp40ab* mutant. a, Quantitative RT-PCR showing changes in the distribution of control transcripts depending on the tested fractions (n = 3). b, RT-qPCR showing changes in the nucleoplasm/chromatin ratio of the hairpin region depending on the pri-miRNA processing type (LTB, loop-to-base; BTL, base-to-loop) (n = 3) in wild-type (WT) plants. c, Loop-to-base-type miRNA precursor fold change (*prp40ab*/WT) for chromatin and nucleoplasmic fractions (n = 3). Primers amplifying hairpin fragments between miRNA and miRNA\* were used. d, Base-to-loop-type miRNA precursors fold change (*prp40ab*/WT) for chromatin and nucleoplasmic fractions (n = 3). Primers amplifying hairpin fragments between miRNA and miRNA\* were used. e, Polyadenylated *pri-miRNA* fold change (*prp40ab*/WT) for chromatin and nucleoplasmic fractions (n = 3). Primers amplifying hairpin fragments between miRNA and miRNA\* were used. Data represent means  $\pm$  SD. Supports Figure 5.

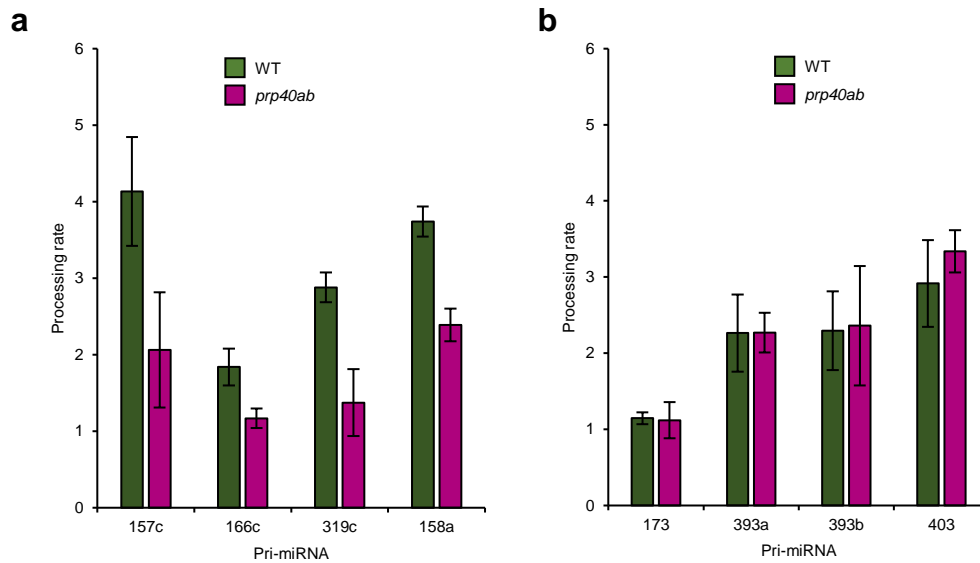

**Supplemental Figure S18.** Cotranscriptional processing rate in *prp40ab* mutant plants depends on DCL1 distribution on *MIR* genes. Cotranscriptional processing was measured with RT-qPCR as the relative abundance of the loop/hairpin region over the amount of unprocessed pri-miRNAs (primers flanking the DCL1 cleavage site) for a, *MIRs* with increased DCL1 occupancy in *prp40ab* plants and b, without increased DCL1 occupancy in *prp40ab* plants. Data represent means  $\pm$  SD ( $n = 3$ ). Supports Figure 5.

## Supplemental Table 1. Primers used in this study

| Name         | Forward Sequence (5' → 3')          | Reverse Sequence (5' → 3')             | Localization               |
|--------------|-------------------------------------|----------------------------------------|----------------------------|
| GAPDH_i3     | TTTCGTTTCTTCTTCTTCTCGAT             | TGATAAACAGCACACACCATCA                 | 3rd intron                 |
| GAPDH_e9     | TGGAAAATTGACCGGAATGT                | TCGTCGTATGTTGCAGCTTT                   | 9th exon                   |
| GAPDH_e10/11 | TTGGTGACAAACAGGTCAAGCA              | AAACTTGTGCGCTCAATGCAATC                | 10th/11th exon             |
| pre_rRNA     | GCGAACCAAAAGATCACCACCT              | TTTCGTTTGCATGTTCCCTTGA                 |                            |
| intergenic   | AGTTTCAATGGAGAGATGTGCGAAATATG       | AAGAGGAAAAGAAAAGAGATGGAGAGA            |                            |
| PRP40a       | ACACTTGGCCTGTTCTCTGTT               | TGCGGAGTCAAGTTTCTCTGG                  | 4th/5th exon               |
| PRP40b       | AAGCACCGTGATGAGTTCCA                | CCAGAGGAGTTTGACGCAATTG                 | 21st/22 <sup>nd</sup> exon |
| PRP40c       | CAAGGAATGTGGTTGCAGCC                | CCAAGCGGATGAGAACCAGA                   | 2nd exon                   |
| At4g24740    | CTCTGAGGATCCCGTTTTTC                | GGGGTGTGGGGTAAAGACT                    | 12 <sup>th</sup> exon      |
| At4g39260    | CGAAATGTTAATTCGCGTGT                | TCCTTTAGCTGCTGTTTCGATT                 | 4 <sup>th</sup> exon       |
| At1g10020    | AAGGGCGCTAACAAAATAGGA               | TCGTAGAACCCAAACCCAAC                   | 2 <sup>nd</sup> exon       |
| At5g07220    | AGGCACTCGACCTCTTGA                  | TAGGCTCCTCCTCCTCTTCC                   | 4 <sup>th</sup> exon       |
| At3g19540    | CAGGCTCTTGGTTTACATT                 | ATGATTCCTTTCAGCTGACG                   | 3 <sup>rd</sup> exon       |
| At5g19120    | GTGGAGGATTCATGGGAAGA                | CAGAGCGTGTCTTTTGTCCA                   |                            |
| At5g61590    | TGCAAAATGGAAGCAGAATCA               | CACGCTCTGTAATGTCTCG                    |                            |
| At1g80440    | TGTCCTCTCGCTCCTCCTA                 | CAGGCGTAGCGATGATCTTT                   |                            |
| At1g14920    | CGACCGAAGCAAACTAAAT                 | CCTCCAATGTCAATGCAAA                    |                            |
| AT4G39400    | GTTTGACCCCGAGCTTATGA                | GACCCGGCTTGTATCTCCTT                   |                            |
| MIR 156a     | GAAGAGAGTGAGCACACAAAGGC             | CAGAAGAGCAGTGAGCACGC                   | hairpin                    |
| MIR 156b     | GACAGAAGAGAGTGAGCAC                 | GACAGAAGAGAGTGAGCACGCAC                | hairpin                    |
| MIR 157a     | GCCTTATGCGATTGAAAACTGG              | GCAAGAACAATGCTCCGAATTG                 | pri-miRNA                  |
| MIR 157a     | CAGAAGATAGAGAGCACAGATG              | GACAGAAGGCTAGAGAGCAC                   | hairpin                    |
| MIR 157c     | TGCTCTCTATACTTCTGTCCACCTT           | GCACCCATGTTAGTATTACGCATAGAT            | pri-miRNA                  |
| MIR 157c     | GAGCACTAAGGATGACATGCAA              | GCAGGTTCTCTCTCTTCTCTCC                 | hairpin                    |
| MIR 157c     | ACACCGCATGTGGATGATAA                | TAGAGATGCAGGTTCTCTCTCTTTC              | loop                       |
| MIR 157c     | GGTTTGAGAGTGTGTTGGTTG               | TAGAGATGCAGGTTCTCTCTCTTTC              | DCL1 cleavage site         |
| MIR 158a     | TGAACAAGGCATCTAAAGTCACA             | TTACTGGACCACGAATTCACCAT                | pri-miRNA                  |
| MIR 158a     | TTTGTCTACAATTTTGGAAAAAG             | GCTTTGTCTACATTTGGGAAAG                 | hairpin                    |
| MIR 158a     | GGCTTTACTTTAGATTCTTCTAGGG           | GCTTTGTCTACATTTGGGAAAG                 | DCL1 cleavage site         |
| MIR 159a     | GCTTTACTGCTTGGTTATGTCAGATCCA        | ACCCTGCTCAACTCATGTTTGA                 | pri-miRNA                  |
| MIR 159b     | TGCTTGGATCTCTAATGCTGTTCA            | TCACCTGTAAACCTCCA                      | pri-miRNA                  |
| MIR 160a     | ATCGATGACCTCCGTGGAT                 | ACCTTAATCTCTTACACATGATGA               | pri-miRNA                  |
| MIR 160a     | CTGGCTCCCTGTATGCCATATG              | CATGGCTCCTCATAACGCCATC                 | hairpin                    |
| MIR 160b     | CTGGCTCCCTGTATGCCACAAGA             | GCTTGACTACTCTGTACGCCAC                 | hairpin                    |
| MIR 161      | TGACCAGTTTATTGCGTCGATCA             | TGCTTTTCCCTCTTTTACAAATGC               | pri-miRNA                  |
| MIR 163      | AGTACCTTAGATAAACCAGCAAAAACC         | AACCGGGAACCTCCAGCACTT                  | pri-miRNA                  |
| MIR 165a     | CCATCATCACCAATTCACCAA               | CCAGACAACATTCCTCCTCAA                  | pri-miRNA                  |
| MIR 165a     | GTTTGTACGTTTGGTTATGTCAGATAG         | GTCCGAGGATACTCTCTATGATC                | hairpin                    |
| MIR 165b     | TTCTGTTGTGGGAATGTTG                 | CAGAGTGATTGAAGGCAATTAACA               | pri-miRNA                  |
| MIR 165b     | GGAAATGTTGTTGGATCGAGG               | CCGACGATACCATGTGGCATG                  | hairpin                    |
| MIR 166c     | TCATGAAGAAGAGAATCACTCG              | GGGTTTTCTTAATTTGTTCTTCCA               | loop                       |
| MIR 166c     | TGCCATTTAGTGTGGAGAGGATTG            | GGGTTTTCTTAATTTGTTCTTCCA               | DCL1 cleavage site         |
| MIR 167a     | TGATCTGCTACGGTGAAGTCTATGG           | GAAACTGCGAACATGATCTAATCGA              | pri-miRNA                  |
| MIR 167a     | GCTGCCAGCATGATCTAATTAG              | CTGCGAACATGATCTAATCGAG                 | hairpin                    |
| MIR 168a     | ATTCGCTTGGTGCAGGTC                  | TCCGATTCAAGTTGATGCAAG                  | pri-miRNA                  |
| MIR 168b     | CGCTTGGTGCAGGTCGGGAA                | ACGGGAGCTCACAAACCAACCA                 | pri-miRNA                  |
| MIR 171c     | ATGTGGATGGAGTTTGGTGTA               | GTGATATTGGCACGGCTCA                    | pri-miRNA                  |
| MIR 171c     | GATATTGGTGCAGTTCAATC                | GGCACGGCTCAATCAATAAAC                  | hairpin                    |
| MIR 173      | GGTGATTAAGTACTTTCGCTTGC             | GCAAGCTCTTTCGCTTACACA                  | pri-miRNA                  |
| MIR 173      | GTTTGCAGGAAATCACAGTGG               | CCTACACAGAGAATCACAGAGG                 | hairpin                    |
| MIR 173      | GGTGATTAAGTACTTTCGCTTGC             | CCTACACAGAGAATCACAGAGG                 | DCL1 cleavage site         |
| MIR 319b     | AGAGCTTTCTCGGTCCACTCAT              | CAATTTGTCTCTCGCATCATTCAT               | pri-miRNA                  |
| MIR 319c     | TCATGGATAGAAAAAGAGGGTAGAA           | AAAAATATCTCCCGCATCATTCAC               | loop                       |
| MIR 319c     | GATTTTCCAGTCCAGTCAATGG              | AAAAATATCTCCCGCATCATTCAC               | DCL1 cleavage site         |
| MIR 393a     | GCATTGATCCTAATTAAGGTG               | TAGCATGATCCAAAACCAAGC                  | hairpin                    |
| MIR 393a     | GACAAAAACCATATGCTCTCA               | TAGCATGATCCAAAACCAAGC                  | DCL1 cleavage site         |
| MIR 393b     | TCGCATTGATCCTAATTAAGCTG             | CGCATGATCCGAAAAGTAA                    | hairpin                    |
| MIR 393b     | ATTGCTCCACCTTGAAAGA                 | CGCATGATCCGAAAAGTAA                    | DCL1 cleavage site         |
| MIR 396a     | ACATGACCCCTCTGTATTCTTCCA            | CAATCGAGCAGAGATATGAAGAAAATC            | pri-miRNA                  |
| MIR 396b     | CCACAGCTTCTTGAACCTTCTTTTTC          | TTGTCATGTTTCCCACAGCTTT                 | pri-miRNA                  |
| MIR 398a     | GCAGTGAAGCAAAGTATGGAG               | TGGAACAGGGGAGATTCAAAGGG                | pri-miRNA                  |
| MIR 399a     | CATTGTACCGGAAATATGCTTCTT            | CCTGCCAATAGAGATCTTACCCTGTA             | pri-miRNA                  |
| MIR 403      | AGAGTCGTATTACATGTTTGTGCTTGA         | ACAGATTACGAGTTTGTGCGTGAA               | pri-miRNA                  |
| MIR 403      | GTTTGTGCTTGAATCTAATCAAC             | GTTTGTGCGTGAATCTAATCAAC                | hairpin                    |
| MIR 403      | GACGATTGTCATTAGAAGAGTCTG            | GTTTGTGCGTGAATCTAATCAAC                | DCL1 cleavage site         |
| MIR 779      | GCTGAGCTTCTCTGTCATCACTATT           | GGTGATACACATAATGAGCAGCAA               | pri-miRNA                  |
| MIR 865      | GGATCTAATTGAGCAAAAATTTG             | GAGGAAAAATATGCGAAATTC                  | hairpin                    |
| MIR 156a     | CGCGGATCCATGTCATGTATCTAGAGATAATATTC | ACGCGTCGACGTTTCTTTGCGTTTCTTGTCCCAAC    | promoter                   |
| MIR 157a     | CGCGGATCCATGAAGATAGGGTTGAGAAAGC     | ACGCGTCGACCACTATCAATGCCTCTCAATTTCTC    | promoter                   |
| MIR 157c     | CGCGGATCCGAAACGCACCAACCATTTTC       | ACGCGTCGACAAAGGAAAAATAGAGAGTAATGTGA    | promoter                   |
| MIR 173      | CGCGGATCCACAAATTCGATCGTCATTACA      | ACGCGTCGACTTGTGAGAAGAAGATCAGTAGAAGAAGA | promoter                   |

For pri-/hairpin amplification mirEX platform primers were used (Zielezinski, A. et al. 2015)

Supplemental Data. Stepien et al. (2022). Plant Cell.

**Figure**                      **Statistical test used**

Figure 4 b                      Mann–Whitney U test  
 Figure 4 d                      Mann–Whitney U test

|          |
|----------|
| p-value  |
| < 0.0001 |
| 0.040    |

Figure 5 a                      Mann–Whitney U test  
 Figure 5 b                      Mann–Whitney U test  
 Figure 5 c                      Mann–Whitney U test  
 Figure 5 d                      Mann–Whitney U test

|         |
|---------|
| p-value |
| 0.004   |
| 0.006   |
| 0.216   |
| 0.000   |

Supplemental Figure S7                      Student's t test

|                                  |                |             |                 |                 |
|----------------------------------|----------------|-------------|-----------------|-----------------|
| SE + RNAPII in<br><i>prp40ab</i> | p-value        |             |                 |                 |
|                                  | <b>PEARSON</b> | <b>LI Q</b> | <b>SPEARMAN</b> | <b>Colormap</b> |
| Ser5                             | 1.36E-45       | 4.48E-15    | 1.86E-43        | 7.99E-17        |
| Ser2                             | 5.53E-25       | 3.44E-10    | 1.62E-08        | 1.30E-10        |

Supplemental Figure S8                      Student's t test

|                                    |                |             |                 |                 |
|------------------------------------|----------------|-------------|-----------------|-----------------|
| AtPRP40 +<br>RNAPII in <i>se-2</i> | p-value        |             |                 |                 |
|                                    | <b>PEARSON</b> | <b>LI Q</b> | <b>SPEARMAN</b> | <b>Colormap</b> |
| Ser5                               | 0.279          | 0.168       | 0.317           | 0.416           |
| Ser2                               | 0.244          | 0.104       | 0.479           | 0.393           |

Supplementary Figure S12                      Student's t test

|           |                |       |       |       |       |       |       |       |       |       |       |       |       |       |       |
|-----------|----------------|-------|-------|-------|-------|-------|-------|-------|-------|-------|-------|-------|-------|-------|-------|
| pri-miRNA |                | 156a  | 158a  | 159b  | 160a  | 160b  | 161   | 165a  | 165b  | 168a  | 171c  | 393a  | 393b  | 396a  | 403   |
| p-value   | <i>prp40ab</i> | 0.004 | 0.002 | 0.015 | 0.025 | 0.005 | 0.002 | 0.001 | 0.022 | 0.007 | 0.016 | 0.001 | 0.003 | 0.021 | 0.009 |
|           | <i>prp40a</i>  | 0.650 | 0.152 | 0.576 | 0.484 | 0.258 | 0.318 | 0.577 | 0.738 | 0.093 | 0.152 | 0.198 | 0.159 | 0.168 | 0.053 |
|           | <i>prp40b</i>  | 0.141 | 0.429 | 0.294 | 0.767 | 0.225 | 0.425 | 0.104 | 0.058 | 0.082 | 0.205 | 0.840 | 0.132 | 0.140 | 0.743 |
|           | <i>prp40c</i>  | 0.687 | 0.875 | 0.134 | 0.956 | 0.064 | 0.521 | 0.662 | 0.391 | 0.129 | 0.354 | 0.263 | 0.104 | 0.338 | 0.524 |

Supplementary Figure S16                      Student's t test

|                                               |         |
|-----------------------------------------------|---------|
| MIR promoter<br>activity in<br><i>prp40ab</i> | p-value |
| 157c                                          | 0.701   |
| 156a                                          | 0.541   |
| 157a                                          | 0.216   |
| 173                                           | 0.718   |
